# Supplementary material for: Caregiving motivations and experiences among family caregivers of patients living with advanced breast cancer in Ghana
Source: PubMed Central journal article supplement (PMC7067415; doi:10.1371/journal.pone.0229683), 2020-03-12
Supplement: pone.0229683.s004.pdf [file pone.0229683.s004.pdf]

**Department of Nursing  
College of Health Sciences  
Kwame Nkrumah University of Science and Technology  
Kumasi-Ghana  
15<sup>th</sup> January, 2020**

**Academic Editor  
PLOS ONE**

Dear Rosemary Frey

**RESPONSE TO REVIEWER COMMENTS- PONE-D-19-26686**

We express our appreciation to the editors and reviewers for the constructive critique of our manuscript. Authors agree with reviewers on most of the concerns raised and have addressed comments in the revised manuscript.

In response to comments, we have provided a point by point response to each comment in the table of changes below. Also, where substantive changes, deletions and insertion of key sentences have been made to the revised manuscripts, exact changes and where (pages) effected, have been clearly stated as part of the responses to comments in the table.

In addition to this cover letter, we have provided a clean copy highlighting in green font all changes made to the revised manuscripts as required. Also, a clean revised manuscript without any annotations, highlighting or comments have been added as required.

Thank you

A handwritten signature in blue ink, appearing to read "Bemah", enclosed within a blue oval scribble.

**DR (MRS) ADWOA BEMAH BONSU  
CORESPONDING AUTHOR**

**Table of Changes**

| <b>Reviewer #</b> | <b>Page Number</b>            | <b>Reviewers' Comments</b>                                                                                                                                                                                                                                                                                                                                                                                                               | <b>Authors' Responses</b>                                                                                                                                                                                                                                                                                                 |
|-------------------|-------------------------------|------------------------------------------------------------------------------------------------------------------------------------------------------------------------------------------------------------------------------------------------------------------------------------------------------------------------------------------------------------------------------------------------------------------------------------------|---------------------------------------------------------------------------------------------------------------------------------------------------------------------------------------------------------------------------------------------------------------------------------------------------------------------------|
| Reviewer #1       | Data analysis and management. | It is unclear in Data analysis whether the procedure you took is the Colaizzi approach – could you clarify this. Colaizzi is difficult to find on line therefore it needs more clarification and preferably a more recent reference in addition. Also, the reference needs to show it is an edited book but consider using a more up to date reference for your methodology and relate more what you did to the reference you are using. | We thank the reviewer for the important suggestion raised on clarifying the Colaizzi's approach used for data analysis.<br><br>The comment has been addressed and highlighted in green font of the revised manuscript, now page 9-10, line 189-217 to provide more clarification on how the Colaizzi's approach was used. |
|                   | Line 55                       | Word form - Wound                                                                                                                                                                                                                                                                                                                                                                                                                        | We thank the reviewer for this important comment. We have addressed this comment in page 3, line 55.                                                                                                                                                                                                                      |
|                   | Line 58                       | article required before treatment – also subject verb agreement – head noun in that sentence is treatment trend (is)                                                                                                                                                                                                                                                                                                                     | This comment has now been addressed in the revised manuscript in page 4, now line 73                                                                                                                                                                                                                                      |
|                   | Line 64                       | add “as well as”                                                                                                                                                                                                                                                                                                                                                                                                                         | We thank the reviewer for the observation made.                                                                                                                                                                                                                                                                           |



|  |               |                                           |                                                                                                                                                                                               |
|--|---------------|-------------------------------------------|-----------------------------------------------------------------------------------------------------------------------------------------------------------------------------------------------|
|  |               |                                           | comment has been addressed and a reference and a more meaningful statement of data analysis has been added in page 11, line 242-244 of the revised manuscript.                                |
|  | Table S1      | Table S1? Where is it?                    | We thank the reviewer for this comment. Table S1 is in the additional file that was submitted with the manuscript and has been highlighted in page 12, now line 263 of the revised manuscript |
|  | Line 336      | replace these for this                    | We thank the reviewer for the important observation. We have addressed this in page 17, now line 364 of the revised manuscript.                                                               |
|  | Line 345      | Cited that?                               | This has been well elaborated in page 17, now line 371-374 of the revised manuscript.                                                                                                         |
|  | Line 443      | delete an 'only'                          | We thank the reviewer for pointing this out. We agree with the comment. Therefore we have addressed in page 20, now line 460-461 of the revised manuscript.                                   |
|  | Line 475 – 78 | Not sure what you are saying here. Sense? | We thank the reviewer for this comment. We have reconstructed the statement into a more meaningful statement in page 21, now line 489 -491 of the revised manuscript.                         |

|             |            |                                                                                                                    |                                                                                                                                                                                                                                                                                                                      |
|-------------|------------|--------------------------------------------------------------------------------------------------------------------|----------------------------------------------------------------------------------------------------------------------------------------------------------------------------------------------------------------------------------------------------------------------------------------------------------------------|
|             | Discussion | Discussion - could do with being a bit sharper and to the point.                                                   | We appreciate the reviewer's comments. As suggested by the reviewer, we have been sharper in the 'discussion' section in page 22-24, now line 504-562 of the revised manuscript.                                                                                                                                     |
|             | Line 526   | I'm not sure the contrast with the Iranian participants adds anything because we aren't told why this is different | We thank the reviewer for this suggestion. the Iranian example has been removed and the statement has been amended as suggested in Page 23, now line 543-546 .                                                                                                                                                       |
|             | Line 542   | incomplete sentence and is it an irony                                                                             | We thank the reviewer for the important input. We have reconstructed the sentence into a complete statement to make it more meaningful in page 27, line 554-557                                                                                                                                                      |
|             | Line 560   | Which home-based model are you referring to? Have you explained it elsewhere in the paper?                         | We thank the reviewer for the important input. The Home based model have been introduced and well elaborated in the 'introduction section (page 3-4, now line 58-77)'. This has given a context to the home-based care model presented in the "conclusion section" page 25, now line 573 of the revised manuscript . |
| Reviewer #2 |            | This article makes an important contribution to family and socio-cultural factors in breast cancer caregiving in   | We thank the reviewer for this valuable feedback. As suggested by the reviewer, we have accordingly                                                                                                                                                                                                                  |

|  |  |                                                                                                                                              |                                   |
|--|--|----------------------------------------------------------------------------------------------------------------------------------------------|-----------------------------------|
|  |  | Ghana. The paper still needs a bit more proofreading, but is otherwise satisfactory in all major respects and I would recommend publication. | proofread the revised manuscript. |
|--|--|----------------------------------------------------------------------------------------------------------------------------------------------|-----------------------------------|
